# Supplementary material
Source: MDPI journal article supplement (https://www.mdpi.com/2673-6489/4/2/17)
Supplement: s1 [file s1]

## Supplementary material

# Selective removal of arsenic and antimony from Pb-Ag sulfide concentrates by alkaline leaching: Thermodynamic and kinetic studies

Blanco-Vino, Zamora, and Ordóñez

**Table 1S.** Reactions of PbS and Ag<sub>2</sub>S with sodium hypochlorite. Data obtained from HSC database.

| Reaction                                                                                                                                       | $\Delta G^0$ , kcal/mol |          |
|------------------------------------------------------------------------------------------------------------------------------------------------|-------------------------|----------|
|                                                                                                                                                | 25°C                    | 60°C     |
| $\text{PbS} + 4\text{ClO}^-_{(\text{aq})} = \text{PbCl}_{3^-}_{(\text{aq})} + \text{SO}_4^{2-}_{(\text{aq})} + \text{Cl}^-_{(\text{aq})}$      | -253.689                | -254.113 |
| $\text{PbS} + 4\text{ClO}^-_{(\text{aq})} = \text{PbSO}_4 + 4\text{Cl}^-_{(\text{aq})}$                                                        | -262.044                | -263.023 |
| $\text{Ag}_2\text{S} + 4\text{ClO}^-_{(\text{aq})} = 2\text{AgCl}_{2^-}_{(\text{aq})} + \text{SO}_4^{2-}_{(\text{aq})}$                        | -236.682                | -237.611 |
| $\text{Ag}_2\text{S} + 4\text{ClO}^-_{(\text{aq})} = 2\text{Ag}^+_{(\text{aq})} + \text{SO}_4^{2-}_{(\text{aq})} + 4\text{Cl}^-_{(\text{aq})}$ | -222.209                | -222.759 |
| $\text{Ag}_2\text{S} + 4\text{ClO}^-_{(\text{aq})} = \text{Ag}_2\text{SO}_4 + 4\text{Cl}^-_{(\text{aq})}$                                      | -229.187                | -230.164 |

**Table 2S.** Reactions of PbS, Ag<sub>2</sub>S, FeS<sub>2</sub>, As<sub>2</sub>S<sub>3</sub>, and Sb<sub>2</sub>S<sub>3</sub> with sodium hypochlorite in an alkaline medium. Data obtained from HSC database.

| Reaction                                                                                                                                                                                                                           | $\Delta G^0$ , kcal/mol |           |
|------------------------------------------------------------------------------------------------------------------------------------------------------------------------------------------------------------------------------------|-------------------------|-----------|
|                                                                                                                                                                                                                                    | 25°C                    | 60°C      |
| $\text{PbS} + 4\text{ClO}^-_{(\text{aq})} + 3\text{OH}^-_{(\text{aq})} = \text{HPbO}_2^-_{(\text{aq})} + \text{SO}_4^{2-}_{(\text{aq})} + 4\text{Cl}^-_{(\text{aq})} + \text{H}_2\text{O}$                                         | -270.551                | -271.850  |
| $\text{PbS} + 4\text{ClO}^-_{(\text{aq})} + 2\text{OH}^-_{(\text{aq})} = \text{PbO} + \text{SO}_4^{2-}_{(\text{aq})} + 4\text{Cl}^-_{(\text{aq})} + \text{H}_2\text{O}$                                                            | -272.212                | -273.454  |
| $\text{Ag}_2\text{S} + 4\text{ClO}^-_{(\text{aq})} + 4\text{OH}^-_{(\text{aq})} = 2\text{AgO}^-_{(\text{aq})} + \text{SO}_4^{2-}_{(\text{aq})} + 4\text{Cl}^-_{(\text{aq})} + 2\text{H}_2\text{O}$                                 | -232.933                | -234.912  |
| $\text{Ag}_2\text{S} + 4\text{ClO}^-_{(\text{aq})} + 2\text{OH}^-_{(\text{aq})} = 2\text{AgOH}_{(\text{aq})} + \text{SO}_4^{2-}_{(\text{aq})} + 4\text{Cl}^-_{(\text{aq})}$                                                        | -227.729                | -228.482  |
| $\text{FeS}_2 + 7\text{ClO}^-_{(\text{aq})} + 2\text{OH}^-_{(\text{aq})} = \text{Fe}^{2+}_{(\text{aq})} + 2\text{SO}_4^{2-}_{(\text{aq})} + 7\text{Cl}^-_{(\text{aq})} + \text{H}_2\text{O}$                                       | -479.862                | -480.324  |
| $\text{FeS}_2 + 7\text{ClO}^-_{(\text{aq})} + 4\text{OH}^-_{(\text{aq})} = \text{Fe}(\text{OH})_2 + 2\text{SO}_4^{2-}_{(\text{aq})} + 7\text{Cl}^-_{(\text{aq})} + \text{H}_2\text{O}$                                             | -500.381                | -502.815  |
| $2\text{FeS}_2 + 15\text{ClO}^-_{(\text{aq})} + 2\text{OH}^-_{(\text{aq})} = 2\text{Fe}^{3+}_{(\text{aq})} + 4\text{SO}_4^{2-}_{(\text{aq})} + 15\text{Cl}^-_{(\text{aq})} + \text{H}_2\text{O}$                                   | -965.398                | -962.617  |
| $2\text{FeS}_2 + 15\text{ClO}^-_{(\text{aq})} + 8\text{OH}^-_{(\text{aq})} = 2\text{Fe}(\text{OH})_3 + 4\text{SO}_4^{2-}_{(\text{aq})} + 15\text{Cl}^-_{(\text{aq})} + \text{H}_2\text{O}$                                         | -1068.907               | -1073.581 |
| $\text{FeS}_2 + 7.5\text{ClO}^-_{(\text{aq})} + 5\text{OH}^-_{(\text{aq})} = \text{FeO}_2^-_{(\text{aq})} + 2\text{SO}_4^{2-}_{(\text{aq})} + 7.5\text{Cl}^-_{(\text{aq})} + 2.5\text{H}_2\text{O}$                                | -534.221                | -537.282  |
| $\text{As}_2\text{S}_3 + 14\text{ClO}^-_{(\text{aq})} + 12\text{OH}^-_{(\text{aq})} = 2\text{AsO}_4^{3-}_{(\text{aq})} + 3\text{SO}_4^{2-}_{(\text{aq})} + 14\text{Cl}^-_{(\text{aq})} + 6\text{H}_2\text{O}$                      | -1028.524               | -1031.233 |
| $\text{As}_2\text{S}_3 + 3\text{Ag}_2\text{S} + 26\text{ClO}^-_{(\text{aq})} + 12\text{OH}^-_{(\text{aq})} = 2\text{Ag}_3\text{AsO}_4 + 6\text{SO}_4^{2-}_{(\text{aq})} + 26\text{Cl}^-_{(\text{aq})} + 6\text{H}_2\text{O}$       | -1756.591               | -1765.087 |
| $\text{As}_2\text{S}_3 + 2\text{FeS}_2 + 29\text{ClO}^-_{(\text{aq})} + 14\text{OH}^-_{(\text{aq})} = 2\text{FeAsO}_4 + 7\text{SO}_4^{2-}_{(\text{aq})} + 29\text{Cl}^-_{(\text{aq})} + 7\text{H}_2\text{O}$                       | -2045.076               | -2055.667 |
| $\text{Sb}_2\text{S}_3 + 14\text{ClO}^-_{(\text{aq})} + 12\text{OH}^-_{(\text{aq})} + 6\text{Na}^+ = 2\text{Na}_3\text{SbO}_4_{(\text{aq})} + 3\text{SO}_4^{2-}_{(\text{aq})} + 14\text{Cl}^-_{(\text{aq})} + 6\text{H}_2\text{O}$ | -960.156                | -966.463  |
| $\text{Sb}_2\text{S}_3 + 14\text{ClO}^-_{(\text{aq})} + 6\text{OH}^-_{(\text{aq})} = \text{Sb}_2\text{O}_5 + 3\text{SO}_4^{2-}_{(\text{aq})} + 14\text{Cl}^-_{(\text{aq})} + 3\text{H}_2\text{O}$                                  | -950.808                | -954.865  |
| $\text{Sb}_2\text{S}_3 + 12\text{ClO}^-_{(\text{aq})} + 6\text{OH}^-_{(\text{aq})} = \text{Sb}_2\text{O}_3 + 3\text{SO}_4^{2-}_{(\text{aq})} + 12\text{Cl}^-_{(\text{aq})} + 3\text{H}_2\text{O}$                                  | -852.208                | -856.062  |
| $\text{Sb}_2\text{S}_3 + 12\text{ClO}^-_{(\text{aq})} + 8\text{OH}^-_{(\text{aq})} = 2\text{SbO}_2^-_{(\text{aq})} + 3\text{SO}_4^{2-}_{(\text{aq})} + 12\text{Cl}^-_{(\text{aq})} + 4\text{H}_2\text{O}$                          | -848.280                | -850.559  |

**Table 3S.** Reactions of PbS, Ag<sub>2</sub>S, FeS<sub>2</sub>, As<sub>2</sub>S<sub>3</sub>, and Sb<sub>2</sub>S<sub>3</sub> with sodium hypochlorite in acid medium. Data obtained from HSC database.

| Reaction                                                                                                                                                                                                                   | $\Delta G^0$ , kcal/mol |           |
|----------------------------------------------------------------------------------------------------------------------------------------------------------------------------------------------------------------------------|-------------------------|-----------|
|                                                                                                                                                                                                                            | 25°C                    | 60°C      |
| $\text{PbS} + 8\text{ClO}^-_{(\text{aq})} + 5\text{H}^+_{(\text{aq})} = \text{HPbO}_2^-_{(\text{aq})} + \text{SO}_4^{2-}_{(\text{aq})} + 4\text{Cl}_{2(\text{g})} + 2\text{H}_2\text{O}$                                   | -279.849                | -285.969  |
| $\text{PbS} + 8\text{ClO}^-_{(\text{aq})} + 6\text{H}^+_{(\text{aq})} = \text{PbO} + \text{SO}_4^{2-}_{(\text{aq})} + 4\text{Cl}_{2(\text{g})} + 3\text{H}_2\text{O}$                                                      | -300.595                | -307.426  |
| $\text{PbS} + 5\text{ClO}^-_{(\text{aq})} + 2\text{H}^+_{(\text{aq})} = \text{PbCl}_3^-_{(\text{aq})} + \text{SO}_4^{2-}_{(\text{aq})} + \text{Cl}_{2(\text{g})} + \text{H}_2\text{O}$                                     | -270.328                | -272.532  |
| $\text{Ag}_2\text{S} + 8\text{ClO}^-_{(\text{aq})} + 4\text{H}^+_{(\text{aq})} = 2\text{AgO}^-_{(\text{aq})} + \text{SO}_4^{2-}_{(\text{aq})} + 4\text{Cl}_{2(\text{g})} + 2\text{H}_2\text{O}$                            | -223.144                | -229.178  |
| $\text{Ag}_2\text{S} + 8\text{ClO}^-_{(\text{aq})} + 6\text{H}^+_{(\text{aq})} = 2\text{AgOH}_{(\text{aq})} + \text{SO}_4^{2-}_{(\text{aq})} + 4\text{Cl}_{2(\text{g})} + 2\text{H}_2\text{O}$                             | -256.112                | -262.454  |
| $\text{FeS}_2 + 14\text{ClO}^-_{(\text{aq})} + 12\text{H}^+_{(\text{aq})} = \text{Fe}^{2+}_{(\text{aq})} + 2\text{SO}_4^{2-}_{(\text{aq})} + 7\text{Cl}_{2(\text{g})} + 6\text{H}_2\text{O}$                               | -558.161                | -569.554  |
| $\text{FeS}_2 + 15\text{ClO}^-_{(\text{aq})} + 14\text{H}^+_{(\text{aq})} = \text{Fe}^{3+}_{(\text{aq})} + 2\text{SO}_4^{2-}_{(\text{aq})} + 7.5\text{Cl}_{2(\text{g})} + 7\text{H}_2\text{O}$                             | -588.403                | -599.601  |
| $\text{FeS}_2 + 15\text{ClO}^-_{(\text{aq})} + 10\text{H}^+_{(\text{aq})} = \text{FeO}_2^-_{(\text{aq})} + 2\text{SO}_4^{2-}_{(\text{aq})} + 7.5\text{Cl}_{2(\text{g})} + 5\text{H}_2\text{O}$                             | -563.582                | -576.164  |
| $\text{As}_2\text{S}_3 + 28\text{ClO}^-_{(\text{aq})} + 16\text{H}^+_{(\text{aq})} = 2\text{AsO}_4^{3-}_{(\text{aq})} + 3\text{SO}_4^{2-}_{(\text{aq})} + 14\text{Cl}_{2(\text{g})} + 8\text{H}_2\text{O}$                 | -1032.435               | -1050.872 |
| $\text{As}_2\text{S}_3 + 28\text{ClO}^-_{(\text{aq})} + 22\text{H}^+_{(\text{aq})} = 2\text{H}_3\text{AsO}_4_{(\text{aq})} + 3\text{SO}_4^{2-}_{(\text{aq})} + 14\text{Cl}_{2(\text{g})} + 8\text{H}_2\text{O}$            | -1088.729               | -1113.485 |
| $\text{As}_2\text{S}_3 + 3\text{Ag}_2\text{S} + 52\text{ClO}^-_{(\text{aq})} + 40\text{H}^+_{(\text{aq})} = 2\text{Ag}_3\text{AsO}_4 + 6\text{SO}_4^{2-}_{(\text{aq})} + 26\text{Cl}_{2(\text{g})} + 20\text{H}_2\text{O}$ | -1960.167               | -2005.758 |
| $\text{As}_2\text{S}_3 + 2\text{FeS}_2 + 58\text{ClO}^-_{(\text{aq})} + 44\text{H}^+_{(\text{aq})} = 2\text{FeAsO}_4 + 7\text{SO}_4^{2-}_{(\text{aq})} + 29\text{Cl}_{2(\text{g})} + 22\text{H}_2\text{O}$                 | -2260.396               | -2311.891 |
| $\text{Sb}_2\text{S}_3 + 28\text{ClO}^-_{(\text{aq})} + 22\text{H}^+_{(\text{aq})} = \text{Sb}_2\text{O}_5 + 3\text{SO}_4^{2-}_{(\text{aq})} + 14\text{Cl}_{2(\text{g})} + 11\text{H}_2\text{O}$                           | -1069.235               | -1093.621 |
| $\text{Sb}_2\text{S}_3 + 24\text{ClO}^-_{(\text{aq})} + 18\text{H}^+_{(\text{aq})} = \text{Sb}_2\text{O}_3 + 3\text{SO}_4^{2-}_{(\text{aq})} + 12\text{Cl}_{2(\text{g})} + 9\text{H}_2\text{O}$                            | -937.358                | -957.978  |
| $\text{Sb}_2\text{S}_3 + 24\text{ClO}^-_{(\text{aq})} + 16\text{H}^+_{(\text{aq})} = 2\text{SbO}_2^-_{(\text{aq})} + 3\text{SO}_4^{2-}_{(\text{aq})} + 12\text{Cl}_{2(\text{g})} + 8\text{H}_2\text{O}$                    | -895.258                | -912.769  |

**Table 4S.** Reactions of PbS, Ag<sub>2</sub>S, FeS<sub>2</sub>, As<sub>2</sub>S<sub>3</sub>, and Sb<sub>2</sub>S<sub>3</sub> with hydrogen peroxide in an alkaline medium Data obtained from HSC database.

| Reaction                                                                                                                                                                                                     | $\Delta G^0$ , kcal/mol |           |
|--------------------------------------------------------------------------------------------------------------------------------------------------------------------------------------------------------------|-------------------------|-----------|
|                                                                                                                                                                                                              | 25°C                    | 60°C      |
| $\text{PbS} + 4\text{H}_2\text{O}_{2(\text{aq})} + 3\text{OH}^-_{(\text{aq})} = \text{HPbO}_2^-_{(\text{aq})} + \text{SO}_4^{2-}_{(\text{aq})} + 5\text{H}_2\text{O}$                                        | -278.387                | -276.795  |
| $\text{PbS} + 4\text{H}_2\text{O}_{2(\text{aq})} + 2\text{OH}^-_{(\text{aq})} = \text{PbO} + \text{SO}_4^{2-}_{(\text{aq})} + 5\text{H}_2\text{O}$                                                           | -280.047                | -278.399  |
| $\text{PbS} + 4\text{H}_2\text{O}_{2(\text{aq})} = \text{PbSO}_4 + 4\text{H}_2\text{O}$                                                                                                                      | -269.879                | -267.968  |
| $\text{Ag}_2\text{S} + 4\text{H}_2\text{O}_{2(\text{aq})} + 4\text{OH}^-_{(\text{aq})} = 2\text{AgO}^-_{(\text{aq})} + \text{SO}_4^{2-}_{(\text{aq})} + 6\text{H}_2\text{O}$                                 | -240.768                | -239.856  |
| $\text{Ag}_2\text{S} + 4\text{H}_2\text{O}_{2(\text{aq})} + 2\text{OH}^-_{(\text{aq})} = 2\text{AgOH}_{(\text{aq})} + \text{SO}_4^{2-}_{(\text{aq})} + 4\text{H}_2\text{O}$                                  | -235.564                | -233.426  |
| $\text{Ag}_2\text{S} + 4\text{H}_2\text{O}_{2(\text{aq})} = 2\text{Ag}^+_{(\text{aq})} + \text{SO}_4^{2-}_{(\text{aq})} + 4\text{H}_2\text{O}$                                                               | -230.045                | -227.703  |
| $\text{Ag}_2\text{S} + 4\text{H}_2\text{O}_{2(\text{aq})} = \text{Ag}_2\text{SO}_4 + 4\text{H}_2\text{O}$                                                                                                    | -237.022                | -235.109  |
| $\text{FeS}_2 + 7\text{H}_2\text{O}_2(\text{a}) + 4\text{OH}^-_{(\text{aq})} = \text{Fe}(\text{OH})_2 + 2\text{SO}_4^{2-}_{(\text{aq})} + 8\text{H}_2\text{O}$                                               | -514.093                | -511.468  |
| $\text{FeS}_2 + 7.5\text{H}_2\text{O}_2(\text{a}) + 4\text{OH}^-_{(\text{aq})} = \text{Fe}(\text{OH})_3 + 2\text{SO}_4^{2-}_{(\text{aq})} + 8\text{H}_2\text{O}$                                             | -549.145                | -546.062  |
| $\text{FeS}_2 + 7.5\text{H}_2\text{O}_2(\text{a}) + 5\text{OH}^-_{(\text{aq})} = \text{FeO}_2^-_{(\text{aq})} + 2\text{SO}_4^{2-}_{(\text{aq})} + 10\text{H}_2\text{O}$                                      | -548.912                | -546.554  |
| $\text{FeS}_2 + 7\text{H}_2\text{O}_2(\text{a}) + 2\text{OH}^-_{(\text{aq})} = \text{Fe}^{2+}_{(\text{aq})} + 2\text{SO}_4^{2-}_{(\text{aq})} + 8\text{H}_2\text{O}$                                         | -493.574                | -488.977  |
| $\text{FeS}_2 + 7.5\text{H}_2\text{O}_2(\text{a}) + \text{OH}^-_{(\text{aq})} = \text{Fe}^{3+}_{(\text{aq})} + 2\text{SO}_4^{2-}_{(\text{aq})} + 8\text{H}_2\text{O}$                                        | -497.390                | -490.580  |
| $\text{As}_2\text{S}_3 + 14\text{H}_2\text{O}_{2(\text{aq})} + 12\text{OH}^-_{(\text{aq})} = 2\text{AsO}_4^{3-}_{(\text{aq})} + 3\text{SO}_4^{2-}_{(\text{aq})} + 20\text{H}_2\text{O}$                      | -1055.948               | -1048.540 |
| $\text{As}_2\text{S}_3 + 3\text{Ag}_2\text{S} + 26\text{H}_2\text{O}_{2(\text{aq})} + 12\text{OH}^-_{(\text{aq})} = 2\text{Ag}_3\text{AsO}_4 + 6\text{SO}_4^{2-}_{(\text{aq})} + 32\text{H}_2\text{O}$       | -1807.521               | -1797.227 |
| $\text{As}_2\text{S}_3 + 2\text{FeS}_2 + 29\text{H}_2\text{O}_{2(\text{aq})} + 14\text{OH}^-_{(\text{aq})} = 2\text{FeAsO}_4 + 7\text{SO}_4^{2-}_{(\text{aq})} + 36\text{H}_2\text{O}$                       | -2101.882               | -2091.516 |
| $\text{Sb}_2\text{S}_3 + 14\text{H}_2\text{O}_{2(\text{aq})} + 12\text{OH}^-_{(\text{aq})} + 6\text{Na}^+ = 2\text{Na}_3\text{SbO}_4_{(\text{aq})} + 3\text{SO}_4^{2-}_{(\text{aq})} + 20\text{H}_2\text{O}$ | -987.580                | -983.769  |
| $\text{Sb}_2\text{S}_3 + 14\text{H}_2\text{O}_{2(\text{aq})} + 6\text{OH}^-_{(\text{aq})} = \text{Sb}_2\text{O}_5 + 3\text{SO}_4^{2-}_{(\text{aq})} + 17\text{H}_2\text{O}$                                  | -978.232                | -972.172  |

|                                                                                                                                                                            |          |          |
|----------------------------------------------------------------------------------------------------------------------------------------------------------------------------|----------|----------|
| $\text{Sb}_2\text{S}_3 + 12\text{H}_2\text{O}_{2(\text{aq})} + 6\text{OH}^-(\text{aq}) = \text{Sb}_2\text{O}_3 + 3\text{SO}_4^{2-}(\text{aq}) + 15\text{H}_2\text{O}$      | -875.714 | -870.896 |
| $\text{Sb}_2\text{S}_3 + 12\text{H}_2\text{O}_{2(\text{aq})} + 8\text{OH}^-(\text{aq}) = 2\text{SbO}_2^-(\text{aq}) + 3\text{SO}_4^{2-}(\text{aq}) + 16\text{H}_2\text{O}$ | -871.786 | -865.393 |

**Table 5S.** Reactions of Pb and Ag species with sulfide or hydroxide ions. Data obtained from HSC database.

| Reaction                                                                                                                    | $\Delta G^\circ$ , kcal/mol |         |
|-----------------------------------------------------------------------------------------------------------------------------|-----------------------------|---------|
|                                                                                                                             | 25°C                        | 60°C    |
| $\text{HPbO}_2^-(\text{aq}) + \text{S}^{2-}(\text{aq}) + \text{H}_2\text{O} = \text{PbS} + 3\text{OH}^-(\text{aq})$         | -18.719                     | -18.138 |
| $\text{PbSO}_4 + 3\text{OH}^-(\text{aq}) = \text{HPbO}_2^-(\text{aq}) + \text{SO}_4^{2-}(\text{aq}) + \text{H}_2\text{O}$   | -8.507                      | -8.827  |
| $2\text{AgO}^-(\text{aq}) + \text{S}^{2-}(\text{aq}) + 2\text{H}_2\text{O} = \text{Ag}_2\text{S} + 4\text{OH}^-(\text{aq})$ | -56.337                     | -53.925 |
| $2\text{AgOH}(\text{aq}) + \text{S}^{2-}(\text{aq}) = \text{Ag}_2\text{S} + 2\text{OH}^-(\text{aq})$                        | -61.541                     | -61.549 |
